# Supplementary material for: Gut microbiota and metabolites of α-synuclein transgenic monkey models with early stage of Parkinson’s disease
Source: PubMed Central journal article supplement (PMC8413421; doi:10.1038/s41522-021-00242-3), 2021-09-02
Supplement: 41522_2021_242_MOESM1_ESM.pdf [file 41522_2021_242_MOESM1_ESM.pdf]

Supplementary Table 1 Division of 14 strains that significantly increased in the A53T group

| Species                                 | Order               | Phylum         |
|-----------------------------------------|---------------------|----------------|
| <i>Intestinimonas butyriciproducens</i> | Clostridiales       | Firmicutes     |
| <i>Flavonifractor plautii</i>           | Clostridiales       | Firmicutes     |
| <i>Oscillibacter valericigenes</i>      | Clostridiales       | Firmicutes     |
| <i>Christensenella massiliensis</i>     | Clostridiales       | Firmicutes     |
| <i>Adlercreutzia equolifaciens</i>      | Eggerthellales      | Actinobacteria |
| <i>Slackia heliotrinireducens</i>       | Eggerthellales      | Actinobacteria |
| <i>Eggerthella lenta</i>                | Eggerthellales      | Actinobacteria |
| <i>Gordonibacter urolithinifaciens</i>  | Eggerthellales      | Actinobacteria |
| <i>Gordonibacter massiliensis</i>       | Eggerthellales      | Actinobacteria |
| <i>Eggerthella sp. YY7918</i>           | Eggerthellales      | Actinobacteria |
| <i>Magnetospirillum gryphiswaldense</i> | Alphaproteobacteria | Proteobacteria |
| <i>Rhodopseudomonas palustris</i>       | Alphaproteobacteria | Proteobacteria |
| <i>Pannonibacter phragmitetus</i>       | Alphaproteobacteria | Proteobacteria |
| <i>Rhodobacter sphaeroides</i>          | Alphaproteobacteria | Proteobacteria |

Supplementary Table 2 We performed targeted metabolics analyses of colon contents from A53Ttransgenic and control monkeys, and a total of 93 metabolites were found.

| Name                       | Control   | A53T     | p_value(t-test2) |
|----------------------------|-----------|----------|------------------|
| Glyceric acid              | 302.852   | 2305.418 | 0.003084611      |
| Myristic acid              | 89.35     | 23.778   | 0.024337375      |
| L-Aspartic acid            | 271.78    | 693.658  | 0.028432144      |
| p-Hydroxyphenylacetic acid | 7.892     | 11.692   | 0.041063736      |
| 3-Methylindole             | 52.358    | 11.918   | 0.048309432      |
| 4-Hydroxybenzoic acid      | 7.248     | 11.858   | 0.06302988       |
| 4-Hydroxycinnamic acid     | 743.182   | 1487.61  | 0.065533686      |
| L-Phenylalanine            | 142.554   | 60.242   | 0.06753077       |
| Oxoglutaric acid           | 113.164   | 44.918   | 0.069050005      |
| Hydroxypropionic acid      | 50.642    | 5.444    | 0.093155245      |
| 3-Indoleacetonitrile       | 6.758     | 13.574   | 0.093918939      |
| 1H-Indole-3-acetamide      | 10.222    | 0.526    | 0.106253005      |
| Behenic acid               | 11.916    | 4.752    | 0.11138822       |
| 3-Hydroxybutyric acid      | 98.52     | 235.068  | 0.119707125      |
| Glutathione                | 13294.064 | 3844.292 | 0.120989737      |
| Adipic acid                | 4.498     | 7.51     | 0.121656987      |
| Citric acid                | 151.788   | 267.814  | 0.123287569      |
| 5-Dodecenoic acid          | 33.762    | 19.3     | 0.125135998      |
| Acetic acid                | 7120.696  | 4720.252 | 0.131692141      |
| Pentadecanoic acid         | 206.902   | 123.882  | 0.133684791      |
| Pelargonic acid            | 3.378     | 5.142    | 0.135627648      |
| Isobutyric acid            | 99.296    | 162.562  | 0.138819812      |
| 3-Hydroxyphenylacetic acid | 4.71      | 8.958    | 0.139132748      |
| Malic acid                 | 19.068    | 31.858   | 0.139168188      |
| 3-Hydroxyisovaleric acid   | 19.516    | 43.854   | 0.150815763      |
| Hydroxyphenyllactic acid   | 205.514   | 365.46   | 0.161589369      |
| Glycolic acid              | 13.152    | 9.52     | 0.164551518      |
| L-Norleucine               | 44.45     | 25.588   | 0.193556532      |

|                                           |          |          |             |
|-------------------------------------------|----------|----------|-------------|
| L-Isoleucine                              | 45.572   | 24.576   | 0.199325749 |
| Methylsuccinic acid                       | 2.542    | 4.324    | 0.200593407 |
| Gamma-Aminobutyric acid                   | 104.694  | 55.788   | 0.210707787 |
| Tetracosanoic acid                        | 10.882   | 5.474    | 0.223553971 |
| Heptanoic acid                            | 5.332    | 9.162    | 0.236186407 |
| Nicotinic acid                            | 4.296    | 3.106    | 0.244015835 |
| L-Valine                                  | 63.822   | 38.568   | 0.244191334 |
| L-Methionine                              | 772.918  | 579.082  | 0.262899751 |
| Malonic acid                              | 5.6      | 12.714   | 0.269006315 |
| L-Tyrosine                                | 32.712   | 21.354   | 0.269685843 |
| L-Leucine                                 | 69.896   | 46.398   | 0.271804894 |
| Caproic acid                              | 9.916    | 17.586   | 0.277747157 |
| Glutaric acid                             | 8.418    | 12.716   | 0.303666193 |
| 3-3-Hydroxyphenyl-3-hydroxypropanoic acid | 1.402    | 3.34     | 0.308332935 |
| Palmitoleic acid                          | 1814.76  | 1345.794 | 0.31905468  |
| Arachidonic acid                          | 65.974   | 154.854  | 0.319711845 |
| Propionic acid                            | 730.138  | 189.654  | 0.319733965 |
| Palmitic acid                             | 629.66   | 468.442  | 0.322005236 |
| 8,11,14-Eicosatrienoic acid               | 38.566   | 48.666   | 0.32481524  |
| Dodecanoic acid                           | 34.374   | 27.188   | 0.325393437 |
| 2-Phenylpropionate                        | 0.952    | 1.01     | 0.334079637 |
| Capric acid                               | 12.354   | 8.638    | 0.34615041  |
| L-Homoserine                              | 267.662  | 140.19   | 0.346304538 |
| Arachidic acid                            | 32.722   | 151.906  | 0.357361874 |
| L-Alanine                                 | 2.516    | 2.102    | 0.35849681  |
| Eicosenoic acid                           | 35.974   | 106.874  | 0.37385979  |
| Glycine                                   | 4.6      | 3.906    | 0.375257816 |
| Stearic acid                              | 390.98   | 254.208  | 0.375681283 |
| Nonadecanoic acid                         | 9.386    | 16.526   | 0.381839188 |
| Oxoadipic acid                            | 110.682  | 62.082   | 0.397328762 |
| L-Glutamic acid                           | 1340.046 | 1785.676 | 0.401546454 |

|                            |         |         |             |
|----------------------------|---------|---------|-------------|
| cis-Aconitic acid          | 12.362  | 13.996  | 0.45996535  |
| L-Proline                  | 56.746  | 89.696  | 0.469428016 |
| Beta-Alanine               | 6.358   | 5.054   | 0.469538489 |
| Phenylacetic acid          | 174.198 | 110.698 | 0.473145852 |
| Oxalic acid                | 453.77  | 220.294 | 0.481638031 |
| Docosapentaenoic acid n6   | 17.068  | 45.148  | 0.510002921 |
| Vanillic acid              | 9.994   | 10.854  | 0.512494808 |
| 2-methyl-Butyric acid      | 147.828 | 132.14  | 0.520593311 |
| Docosatrienoic acid        | 7.754   | 17.188  | 0.526755298 |
| Isovaleric acid            | 145.486 | 128.956 | 0.531357669 |
| 3-Methyl-2-oxovaleric acid | 248.614 | 265.574 | 0.600483883 |
| Butyric acid               | 741.602 | 839.3   | 0.623792116 |
| Erucic acid                | 8.15    | 9.936   | 0.666657791 |
| Norvaline                  | 8.72    | 12.85   | 0.675106048 |
| Pyroglutamic acid          | 19.61   | 29.284  | 0.678023772 |
| Fumaric acid               | 11.354  | 14.74   | 0.6981714   |
| L-Lysine                   | 133.324 | 160.336 | 0.698512415 |
| Suberic acid               | 7.954   | 8.328   | 0.700445747 |
| Linoleic acid              | 459.582 | 522.4   | 0.72509539  |
| Succinic acid              | 12.294  | 14.768  | 0.727348136 |
| L-Serine                   | 69.522  | 60.122  | 0.749440992 |
| L-Alpha-aminobutyric acid  | 1.36    | 1.544   | 0.794358045 |
| Phenyllactic acid          | 1.376   | 1.268   | 0.829735249 |
| Docosahexaenoic acid       | 16.368  | 19.708  | 0.842452142 |
| Hydrocinnamic acid         | 49.65   | 52.716  | 0.844586326 |
| Pimelic acid               | 6.374   | 6.91    | 0.850949343 |
| Caprylic acid              | 4.378   | 4.024   | 0.861814725 |
| Alpha-Linolenic acid       | 343.196 | 321.984 | 0.868830599 |
| Valeric acid               | 206.5   | 211.042 | 0.886335696 |
| Nervonic acid              | 132.112 | 144.974 | 0.889805407 |
| D-2-Hydroxyglutaric acid   | 13.308  | 12.66   | 0.931870794 |

|                    |        |        |             |
|--------------------|--------|--------|-------------|
| L-Asparagine       | 52.93  | 50.77  | 0.945259465 |
| Heptadecanoic acid | 53.216 | 51.898 | 0.948689465 |
| Melatonin          | 23.732 | 23.788 | 0.972782961 |

---

Supplementary Table 3 General characteristics of the A53T transgenic and control monkeys.

|    | <b>Animal</b> | <b>Group</b> | <b>Age (years)</b> | <b>Sex</b> | <b>Weight (Kg)</b> |
|----|---------------|--------------|--------------------|------------|--------------------|
| 1  | 120714        | Control      | 7                  | female     | 6.0                |
| 2  | 120718        | Control      | 7                  | female     | 5.8                |
| 3  | 120720        | Control      | 7                  | female     | 5.2                |
| 4  | 120708        | Control      | 7                  | female     | 5.4                |
| 5  | 110807        | Control      | 6                  | male       | 7.7                |
| 6  | 120666        | A53T         | 6                  | female     | 5.3                |
| 7  | 130996        | A53T         | 5.5                | female     | 6.2                |
| 8  | 130916        | A53T         | 5.5                | female     | 5.7                |
| 9  | 110217        | A53T         | 7                  | male       | 6.4                |
| 10 | 130919        | A53T         | 5.5                | male       | 5.0                |

Supplementary Figure 1

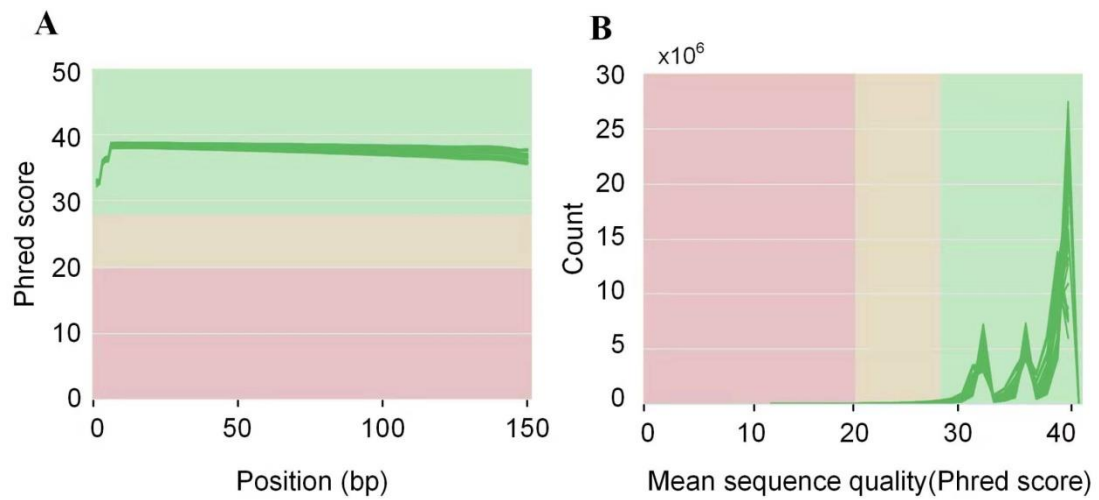

A. The mean quality value across each base position in the read, B. The number of reads with average quality scores
